# Supplementary material for: Improvement of therapeutic effects of mesenchymal stem cells in myocardial infarction through genetic suppression of microRNA-142
Source: PubMed Central journal article supplement (PMC5689630; doi:10.18632/oncotarget.20935), 2017-09-15
Supplement: oncotarget-08-85549-s001.pdf [file oncotarget-08-85549-s001.pdf]

## **Improvement of therapeutic effects of mesenchymal stem cells in myocardial infarction through genetic suppression of microRNA-142**

### **SUPPLEMENTARY MATERIALS**

**Supplementary Table 1: Bioinformatics index for CXCR7-targeting miRNAs.** See Supplementary\_ Table\_1
